# Supplementary figures and images for: Risk Assessment for Clinical Attachment Loss in Periodontitis Patients: A Retrospective Observational Study
Source: Research Square preprint supplement (doi:10.21203/rs.3.rs-6947923/v1), 2025-07-29

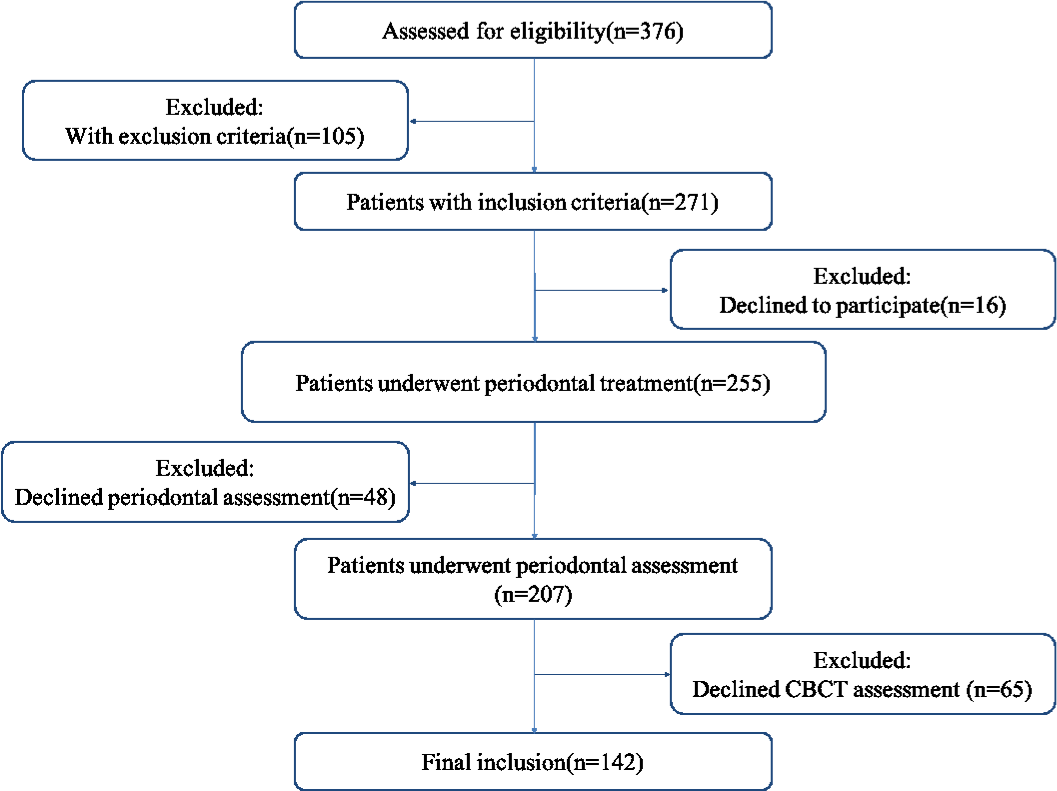


Supplementary figure 1: Flowchart of the number of patients enrolled

Supplement: Supplementary file 1 [file 7c137420ba1e82dd3419c097.docx]
